# Supplementary material for: MPTP-Treated Zebrafish Recapitulate ‘Late-Stage’ Parkinson’s-like Cognitive Decline
Source: MDPI journal article supplement (doi:10.3390/toxics10020069), 2022-02-04
Supplement: s1 [file s1]

# Supplementary Materials: MPTP-treated zebrafish recapitulate ‘late-stage’ Parkinson’s-like cognitive decline

Alim A. Bashirzade, Sergey V. Cherezis, Alisa S. Belova, Alexey V. Drobkov, Anastasiia D. Korotaeva, Soheil Azizi-Arani, Amirhossein Azimirad, Eric Odle, Emma-Yanina V. Gild, Oleg V. Ardashov, Konstantin P. Volcho, Dmitrii V. Bozhko, Vladislav O. Myrov, Sofia M. Kolchanova, Aleksander I. Polovian, Georgii K. Galumov, Nariman F. Salakhutdinov, Tamara G. Amstislavskaya and Allan V. Kalueff

**Table S1.** The number of fish used in each of the two experiments.

| Group   | Total fish   | Fatalities  | Mortality Rate (%) | Lethality of MPTP exposure (by dose), % |
|---------|--------------|-------------|--------------------|-----------------------------------------|
| Control | 27 + 12 = 39 | 5 + 1 = 6   | 15.38              |                                         |
| 50 µg   | 12           | 3           | 25                 | 9.7                                     |
| 100 µg  | 28 + 13 = 41 | 15+2 = 17   | 41.46              | 25.98                                   |
| 200 µg  | 25 + 16 = 41 | 15 + 8 = 23 | 56.09              | 40.72                                   |
| 400 µg  | 35           | 27          | 77.14              | 61.76                                   |

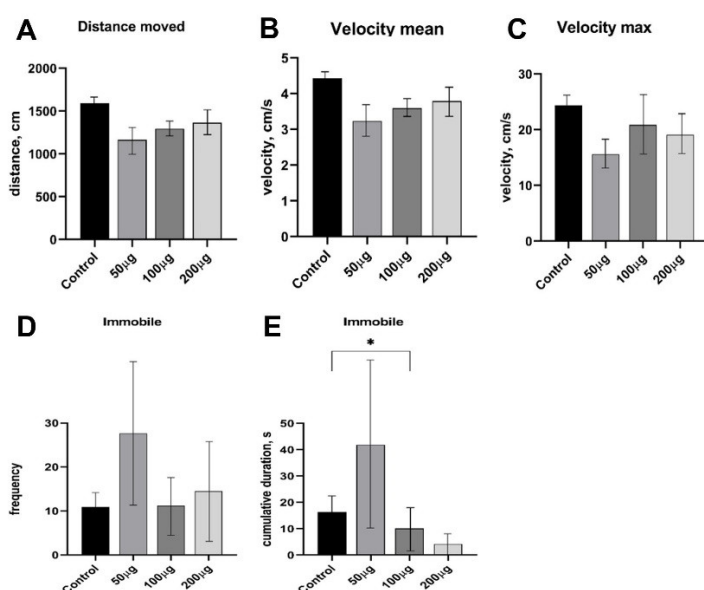

**Figure S1.** Zebrafish behaviors in the novel tank test. Data for panels (A) and (B) were analyzed using a one-way ANOVA (factor - dose) yielding no significant differences from vs. controls, n = 9-18 per group. Data for panels (C-E) were analyzed using Kruskal-Wallis H test. Data are presented as mean ± SEM. \* - p < 0.05 vs Control fish, H test.
